# Supplementary material for: Deep Learning for Accurate Diagnosis of Liver Tumor Based on Magnetic Resonance Imaging and Clinical Data
Source: PubMed Central journal article supplement (PMC7271965; doi:10.3389/fonc.2020.00680), 2020-05-28

**Table S1 Baseline characteristics of the training and validation set**

| Variables                                                                                                                         | Cyst       | Hemangioma | FNH        | Benign nodule | HCC        | Metastatic malignancy | Other primary malignancy | Benign     | Malignant  | Total      |
|-----------------------------------------------------------------------------------------------------------------------------------|------------|------------|------------|---------------|------------|-----------------------|--------------------------|------------|------------|------------|
| <b>Training set baseline characteristics</b>                                                                                      |            |            |            |               |            |                       |                          |            |            |            |
| Patients with pathology images                                                                                                    | 17 (15%)   | 65 (28%)   | 41 (22%)   | 53 (36%)      | 337 (98%)  | 95 (100%)             | 87 (100%)                | 176 (26%)  | 519 (99%)  | 695 (57%)  |
| Patients with image-diagnosis images                                                                                              | 1368       | 2796       | 918        | 864           | 8916       | 3156                  | 2640                     | 5946       | 14712      | 20658      |
|                                                                                                                                   | 100 (85%)  | 164 (72%)  | 149 (78%)  | 95 (64%)      | 7 (2%)     | 0 (0%)                | 0 (0%)                   | 508 (74%)  | 7 (1%)     | 515 (43%)  |
| Male                                                                                                                              | 2016       | 3900       | 2262       | 2550          | 222        | 0                     | 0                        | 10728      | 222        | 10950      |
| image                                                                                                                             | 48 (41%)   | 85 (37%)   | 87 (46%)   | 114 (77%)     | 293 (85%)  | 48 (51%)              | 46 (53%)                 | 334 (49%)  | 387 (74%)  | 721 (60%)  |
| Female                                                                                                                            | 1272       | 2310       | 1482       | 2592          | 7698       | 1914                  | 1398                     | 7656       | 11010      | 18666      |
| images                                                                                                                            | 69 (59%)   | 144 (63%)  | 103 (54%)  | 34 (23%)      | 51 (15%)   | 47 (49%)              | 41 (47%)                 | 350 (51%)  | 139 (26%)  | 489 (40%)  |
| Age (years)                                                                                                                       | 2112       | 4386       | 1698       | 822           | 1440       | 1242                  | 1242                     | 9018       | 3924       | 12942      |
|                                                                                                                                   | 55 (26-84) | 48 (20-85) | 36 (17-73) | 53 (20-80)    | 57 (19-88) | 58 (30-82)            | 64 (29-82)               | 47 (17-85) | 58 (19-88) | 52 (17-88) |
| Age<=40 male                                                                                                                      | 3 (3%)     | 22 (10%)   | 55 (29%)   | 18 (12%)      | 25 (7%)    | 6 (6%)                | 0 (0%)                   | 98 (14%)   | 31 (6%)    | 129 (11%)  |
| Age<=40 female                                                                                                                    | 7 (6%)     | 36 (16%)   | 74 (39%)   | 2 (1%)        | 3 (1%)     | 2 (2%)                | 1 (1%)                   | 119 (17%)  | 6 (1%)     | 125 (10%)  |
| Age>40 male                                                                                                                       | 45 (38%)   | 63 (28%)   | 32 (17%)   | 96 (65%)      | 268 (78%)  | 42 (44%)              | 46 (53%)                 | 236 (35%)  | 356 (68%)  | 592 (49%)  |
| Age>40 female                                                                                                                     | 62 (53%)   | 108 (47%)  | 29 (15%)   | 32 (22%)      | 48 (14%)   | 45 (47%)              | 40 (46%)                 | 231 (34%)  | 133 (25%)  | 364 (30%)  |
| Data are n, n (%) or median (IQR). N= 1210 patients and 31608 images (5268 groups, 6 images from 6 different sequences per group) |            |            |            |               |            |                       |                          |            |            |            |
| <b>Validation set baseline characteristics</b>                                                                                    |            |            |            |               |            |                       |                          |            |            |            |
| Patients with pathology images                                                                                                    | 1 (3%)     | 12 (26%)   | 5 (56%)    | 2 (22%)       | 47 (100%)  | 37 (100%)             | 15 (100%)                | 20 (20%)   | 99 (100%)  | 119 (59%)  |
| Patients with image-diagnosis images                                                                                              | 78         | 642        | 108        | 54            | 1692       | 1224                  | 654                      | 882        | 3570       | 4452       |
|                                                                                                                                   | 37 (97%)   | 34 (74%)   | 4 (44%)    | 7 (78%)       | 0 (0%)     | 0 (0%)                | 0 (0%)                   | 82 (80%)   | 0 (0%)     | 82 (41%)   |
| Male                                                                                                                              | 1230       | 624        | 48         | 462           | 0          | 0                     | 0                        | 2364       | 0          | 2364       |
| image                                                                                                                             | 26 (68%)   | 18 (39%)   | 5 (56%)    | 5 (56%)       | 38 (81%)   | 18 (49%)              | 9 (60%)                  | 54 (53%)   | 65 (66%)   | 119 (59%)  |
| Female                                                                                                                            | 870        | 330        | 60         | 414           | 1446       | 738                   | 384                      | 1674       | 2568       | 4242       |
| images                                                                                                                            | 12 (32%)   | 28 (61%)   | 4 (44%)    | 4 (44%)       | 9 (19%)    | 19 (51%)              | 6 (40%)                  | 48 (47%)   | 34 (34%)   | 82 (41%)   |
|                                                                                                                                   | 438        | 936        | 96         | 102           | 246        | 486                   | 270                      | 1572       | 1002       | 2574       |

| Age (years)    | 62 (34-87) | 53 (25-78) | 32 (17-52) | 55 (45-69) | 59 (34-80) | 58 (17-72) | 58 (41-77) | 55 (17-87) | 58 (17-80) | 56 (17-87) |
|----------------|------------|------------|------------|------------|------------|------------|------------|------------|------------|------------|
| Age<=40 male   | 1 (3%)     | 2 (4%)     | 3 (33%)    | 0 (0%)     | 2 (4%)     | 1 (3%)     | 0 (0%)     | 6 (6%)     | 3 (3%)     | 9 (4%)     |
| Age<=40 female | 1 (3%)     | 6 (13%)    | 4 (44%)    | 0 (0%)     | 1 (2%)     | 1 (3%)     | 0 (0%)     | 11 (11%)   | 2 (2%)     | 13 (6%)    |
| Age>40 male    | 25 (66%)   | 16 (35%)   | 2 (22%)    | 5 (56%)    | 36 (77%)   | 17 (46%)   | 9 (60%)    | 48 (47%)   | 62 (63%)   | 110 (55%)  |
| Age>40 female  | 11 (29%)   | 22 (48%)   | 0 (0%)     | 4 (44%)    | 8 (17%)    | 18 (49%)   | 6 (40%)    | 37 (36%)   | 32 (32%)   | 69 (34%)   |

Data are n, n (%) or median (IQR). N= 201 patients and 6816 images (1136 groups, 6 images from 6 different sequences per group)

**Table S2 Disease distribution in each category**

| Disease distribution in each category of training set (n=1210 patients)                                                                        |                                                                                                                                                                                                                                                                                                                                                                         |
|------------------------------------------------------------------------------------------------------------------------------------------------|-------------------------------------------------------------------------------------------------------------------------------------------------------------------------------------------------------------------------------------------------------------------------------------------------------------------------------------------------------------------------|
| cyst                                                                                                                                           | simple hepatic cyst 115, cyst with bleeding 1, mucinous cystadenoma 1                                                                                                                                                                                                                                                                                                   |
| Hemangioma                                                                                                                                     | cavernous hemangioma 229                                                                                                                                                                                                                                                                                                                                                |
| FNH                                                                                                                                            | focal nodular hyperplasia of hepatocytes 190                                                                                                                                                                                                                                                                                                                            |
| Benign nodules                                                                                                                                 | regenerative nodules 121, dysplasia nodules 26, epithelioid angiomyolipoma 1                                                                                                                                                                                                                                                                                            |
| HCC                                                                                                                                            | hepatocellular carcinoma 344                                                                                                                                                                                                                                                                                                                                            |
| Metastatic malignant tumors from other sites (primary cancer)                                                                                  | colorectal cancer 63, breast cancer 9, pancreatic cancer 5, pancreatic neuroendocrine carcinoma 2, lung cancer 3, gastric cancer 3, gallbladder cancer 3, cervical cancer 1, Uterine leiomyosarcoma 1, anal canal neuroendocrine carcinoma 1, anal malignant melanoma 1, skin melanoma 1, right mandibular adenoid cystic carcinoma 1, retroperitoneal smooth sarcoma 1 |
| Primary hepatic malignancies other than HCC                                                                                                    | adenocarcinoma 54, intrahepatic cholangiocarcinoma 16, mixed hepatocellular carcinoma-cholangiocarcinoma 6, intrabiliary papilloma 5, sarcoma 3, neuroendocrine carcinoma 1, adenosquamous carcinoma 1, malignant perivascular epithelioid cell tumor (PEComa) 1                                                                                                        |
| Disease distribution in each category of validation set (n=201 patients and cases indicated by black body did not appear in the training set.) |                                                                                                                                                                                                                                                                                                                                                                         |
| cyst                                                                                                                                           | simple hepatic cyst 37, multiple cystic lesions, complex cysts 1                                                                                                                                                                                                                                                                                                        |
| Hemangioma                                                                                                                                     | cavernous hemangioma 46                                                                                                                                                                                                                                                                                                                                                 |
| FNH                                                                                                                                            | focal nodular hyperplasia of hepatocytes 9                                                                                                                                                                                                                                                                                                                              |
| Benign nodules                                                                                                                                 | regenerative nodules 3, dysplasia nodules 3, hamartoma 1, epithelioid angiomyolipoma 1, bile duct adenoma 1                                                                                                                                                                                                                                                             |
| HCC                                                                                                                                            | 47 hepatocellular carcinoma                                                                                                                                                                                                                                                                                                                                             |
| Metastatic malignant tumors from other sites (primary cancer)                                                                                  | colorectal cancer 27, skin melanoma 2, pancreatic neuroendocrine carcinoma 2, breast cancer 2, lung cancer 3, ovarian cancer 1                                                                                                                                                                                                                                          |
| Primary hepatic malignancies other than HCC                                                                                                    | Primary hepatic malignancies other than HCC: adenocarcinoma 12, intrahepatic cholangiocarcinoma 1, neuroendocrine carcinoma 1, malignant fibrous histiocytoma 1                                                                                                                                                                                                         |

**Table S3 Medical text and laboratory data coding table**

|                               |                                                                                                   |
|-------------------------------|---------------------------------------------------------------------------------------------------|
| Age(years)                    | <40 , [1,0]; >40,[0,1]                                                                            |
| Gender                        | female , [1,0] ; male , [0,1]                                                                     |
| Cirrhosis-related history     | no , [1,0,0,0] ; HBV/HCV related , [0,1,0,0] ;<br>Alcoholic , [0,0,1,0] ; Obstructive , [0,0,0,1] |
| Other cancer                  | from liver and bile duct , [1,0] ; from other cites [0,1]                                         |
| AFP (ng/mL)                   | <8.78 , [1,0,0] ; x<400 , [0,1,0] ; x>400 , [0,0,1]                                               |
| CEA(ng/mL)                    | <5 , [1,0] ; >5 , [0,1]                                                                           |
| CA-125(U/mL)                  | <35 , [1,0] ; >35 , [0,1]                                                                         |
| CA19-9(IU/mL)                 | <37 , [1,0] ; >37 , [0,1]                                                                         |
| PSA(ng/mL)                    | <4 , [1,0] ; >4 , [0,1]                                                                           |
| Ferritin(μg/L)                | <400 , [1,0]; >400 , [0,1]                                                                        |
| Albumin(g/L)                  | <28 , [1,0,0] ; <35 , [0,1,0] ; > 35 , [0,0,1]                                                    |
| Total bilirubin(μmol/L)       | <34 , [1,0,0] ; <51 , [0,1,0] ; > 51 , [0,0,1]                                                    |
| Prolonged prothrombin time(s) | <4 , [1,0,0] ; <6 , [0,1,0] ; > 6 , [0,0,1]                                                       |
| Hepatic encephalopathy(score) | <1 , [1,0,0] ; <3 , [0,1,0] ; > 4 , [0,0,1]                                                       |
| Ascites                       | Yes , [1,0] ; No , [0,1]                                                                          |

**Table S4 Imaging parameters in various sequences of magnetic resonance imaging**

| Sequences                                                        | Imaging parameters                                                                                                                                                                                 |
|------------------------------------------------------------------|----------------------------------------------------------------------------------------------------------------------------------------------------------------------------------------------------|
| T1-weighted sequences                                            | TR= 4–176 ms<br>TE= 1–3 ms<br>flip angle=10–70°<br>bandwidth= 62–1100 Hz<br>Slice thickness= 4–6 mm<br>Image matrix= 256 × 80 to 320 × 224 mm<br>field-of-view(FOV)=300 × 200 mm to 500 × 400 mm   |
| T2-weighted sequences                                            | TR=2000–6000 ms<br>TE=1-155 ms<br>flip angle=1–180°<br>bandwidth=40–800 Hz<br>slice thickness=6–8 mm<br>image matrix=256 × 100 to 320 × 256 mm<br>field-of-view(FOV)= 400 × 100 mm to 500 × 400 mm |
| Diffusion-weighted imaging<br>(b-values: 800 s/mm <sup>2</sup> ) | TR= 4000-6000 ms<br>TE= 6–100 ms<br>flip angle=1–180°<br>bandwidth=60–2500 Hz<br>slice thickness=6–8 mm<br>image matrix =96 × 100 to 192× 130mm<br>field-of-view(FOV)= 300× 100 mm to 600× 400 mm  |

**Data file S1:**

The cross-validation results of three major models were as follows:

Model A: seven-way classifier using six sequences

Model D: binary classifier using three un-enhanced sequences (T2, DWI, T1-precontrast)

Model G: three-way classifier using three un-enhanced sequences (T2, DWI, T1-precontrast) and clinical data

The mean accuracy of five-fold cross-validation for models:

Model A:  $(0.7631+0.7621+0.7823+0.7751+0.7731)/5=0.7714$

Model D:  $(0.8427+0.908+0.8790+0.9073+0.9034)/5=0.8881$

Model G:  $(0.8447+0.8416+0.8519+0.875+0.8485)/5=0.8523$

And their loss during training were:

Model A: 0.0193 0.0036 0.0049 0.0006 0.0060

Model D: 0.0056 0.0015 0.0071 0.0102 0.0063

Model G: 0.0025 0.0030 0.0035 0.0019 0.0041

ROC curves for each fold cross-validation for each model: Model A, Model D, Model G, in order

A.

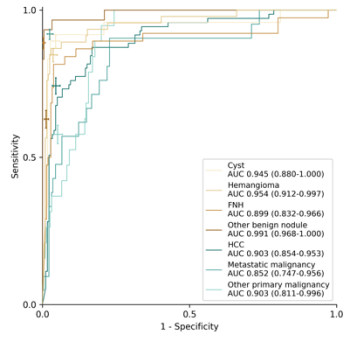

B.

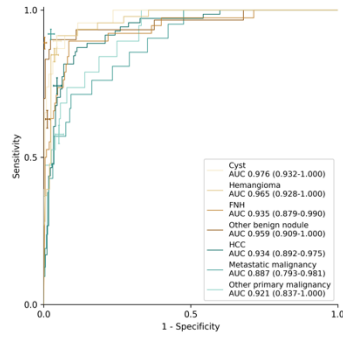

C.

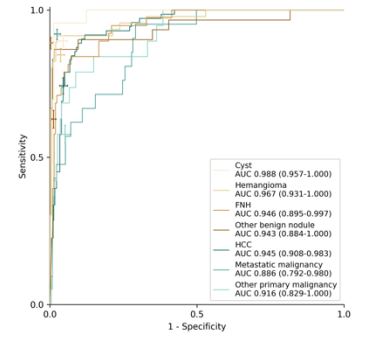

D.

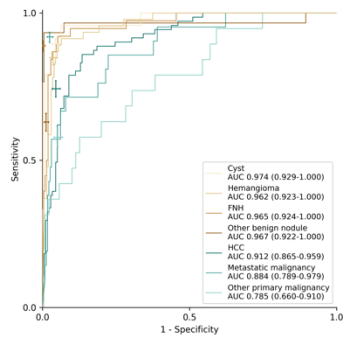

E.

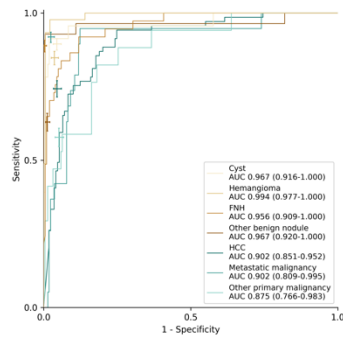

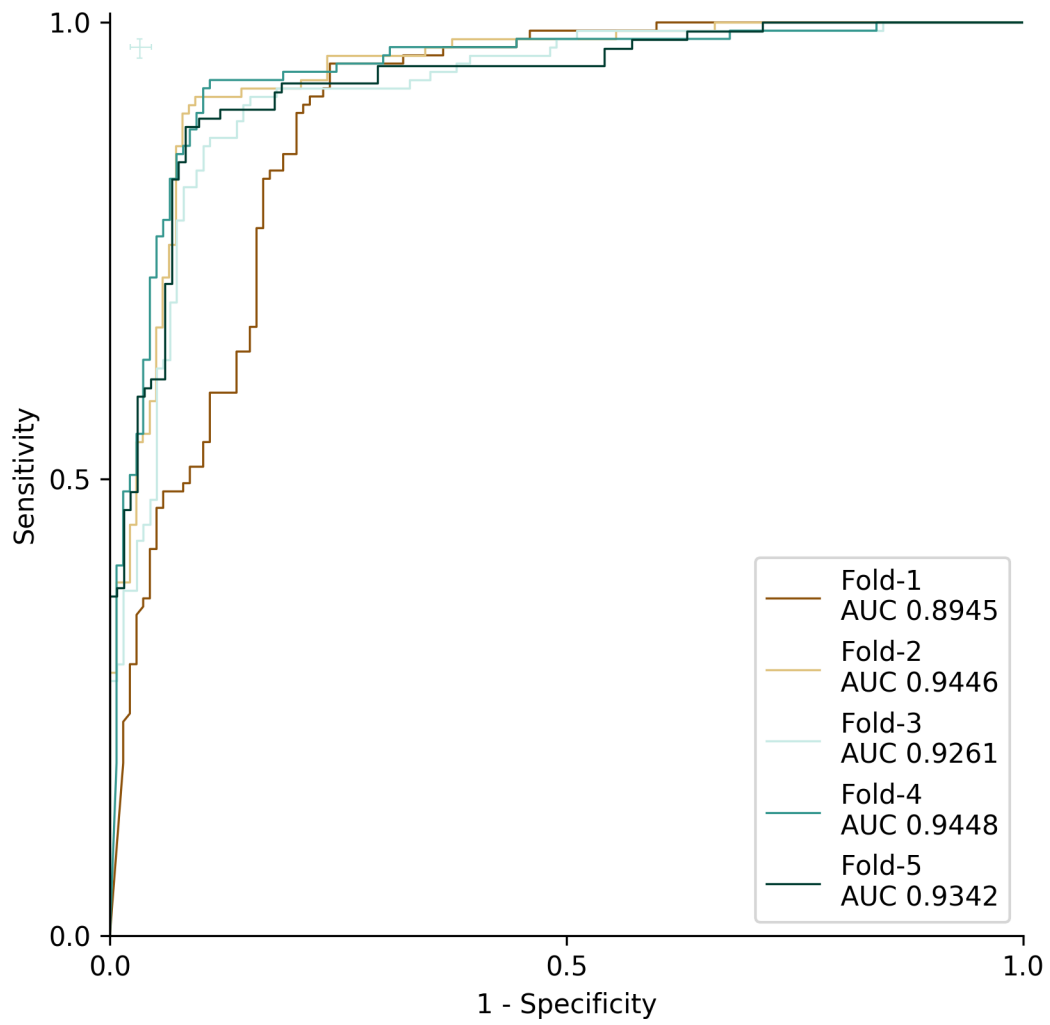



A.

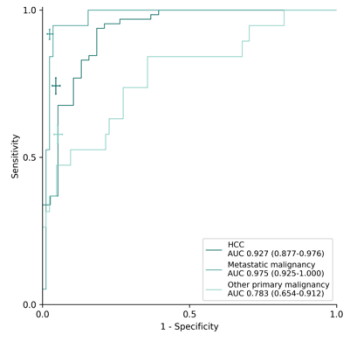

B.

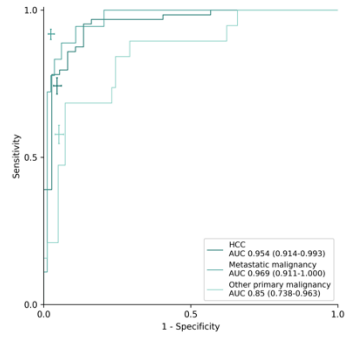

C.

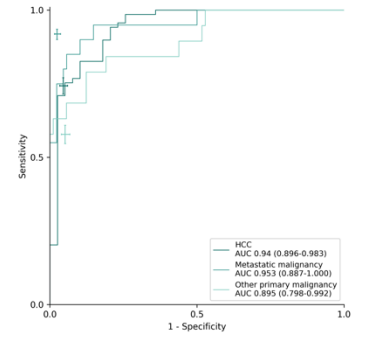

D.

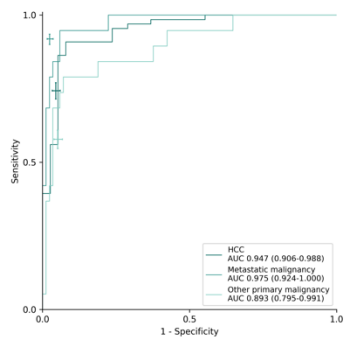

E.

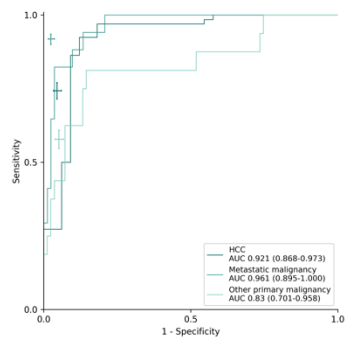

Supplement: Data_Sheet_1.pdf [file Data_Sheet_1.pdf]
