# Supplementary material for: Deep Learning for Accurate Diagnosis of Liver Tumor Based on Magnetic Resonance Imaging and Clinical Data
Source: PubMed Central journal article supplement (PMC7271965; doi:10.3389/fonc.2020.00680), 2020-05-28
Supplement: Data_Sheet_2.pdf [file Data_Sheet_2.pdf]

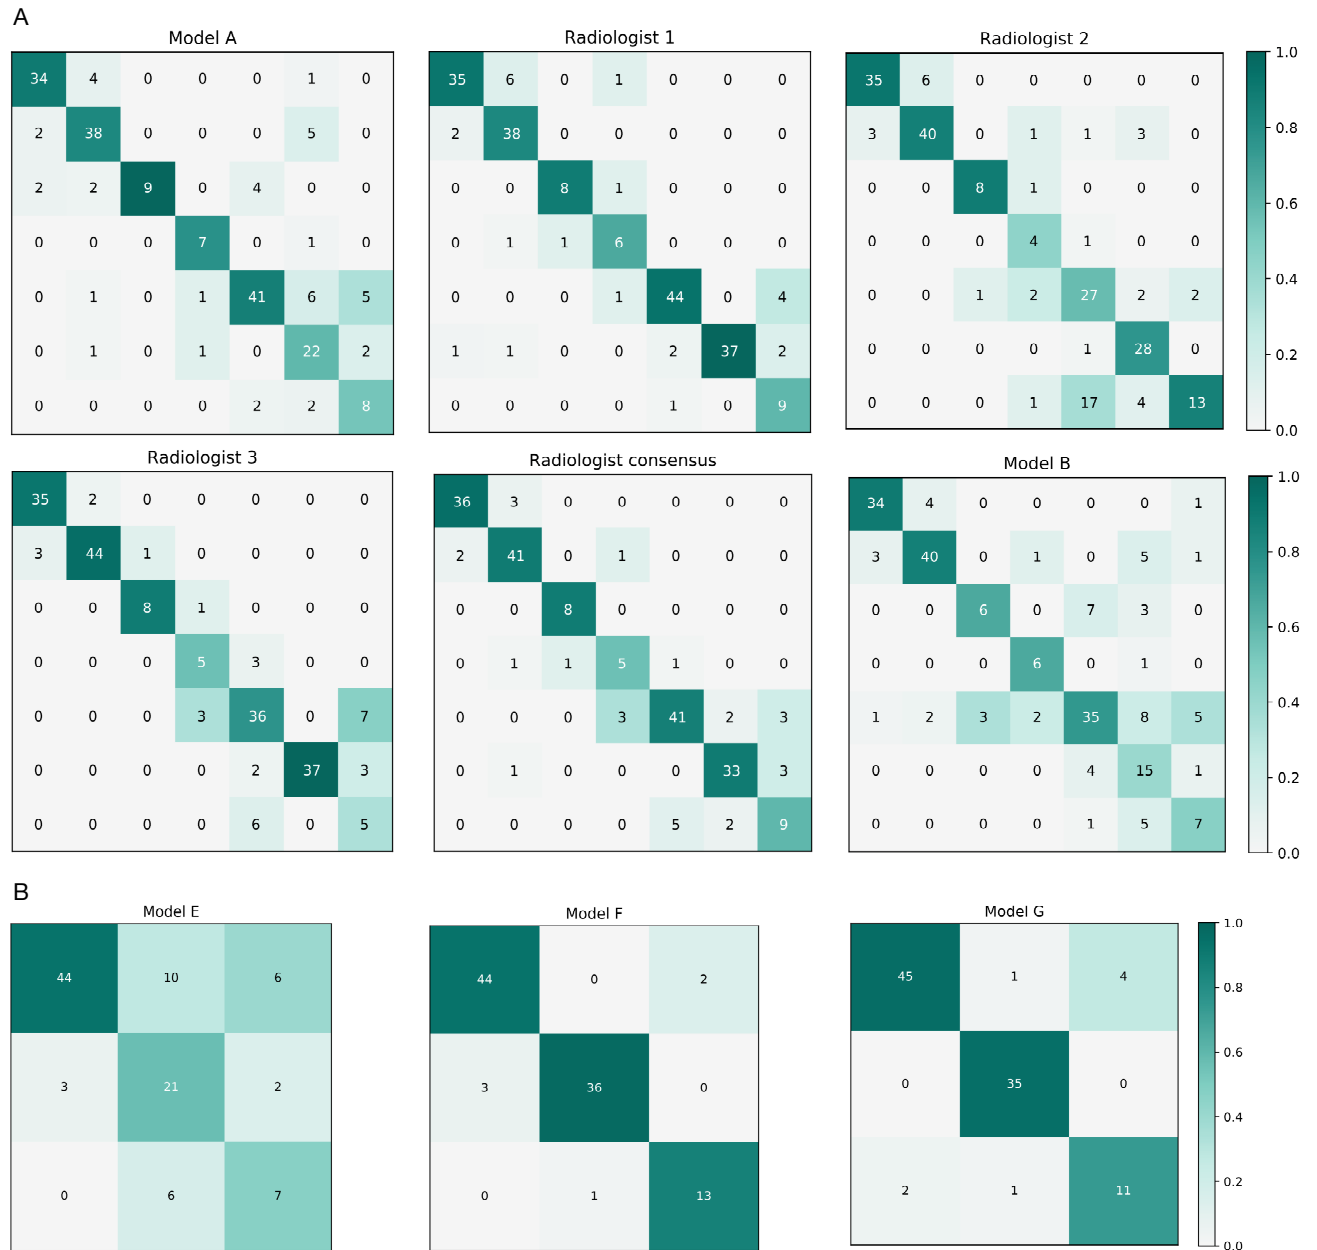

**Fig. S2. Confusion matrix comparison between CNNs and radiologists.** These show the number of patients for each class of gold standard and predicted class. The number of patients who were correctly predicted are found on the diagonal. (A) Confusion matrices for Model A and radiologists for the seven-way classification task in the validation set reveal similarities in misclassification between human experts and the CNN; confusion matrices for Model B, which performance is inferior to Model A. (B) Confusion matrices for Model E, F, G and radiologists for the three-way classification task in new validation set reveal the CNN with clinical data achieve higher performance than experienced experts.

**i) Epithelioid angiomyolipoma**

A. T2WI

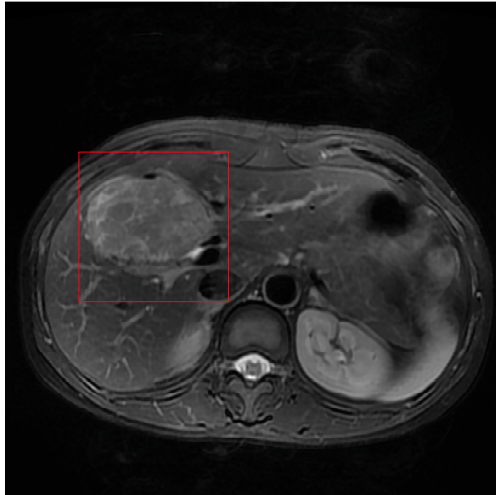

B. DWI

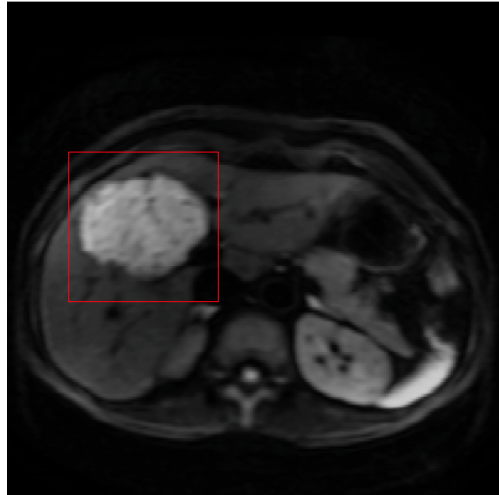

C. Precontrast—T1WI

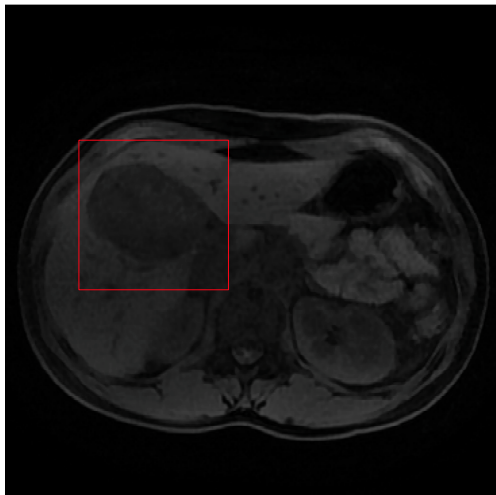

D. late arterial phase

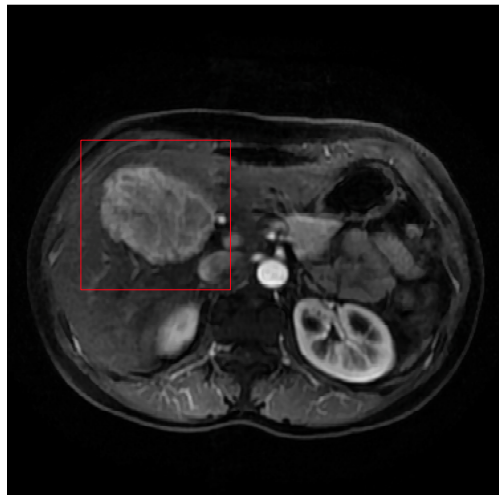

E. portal venous phase

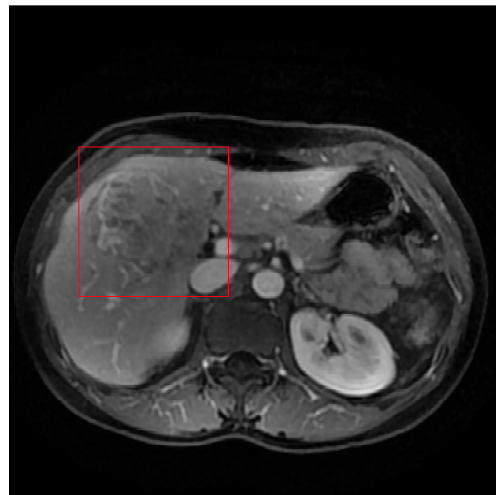

F. equilibrium phase

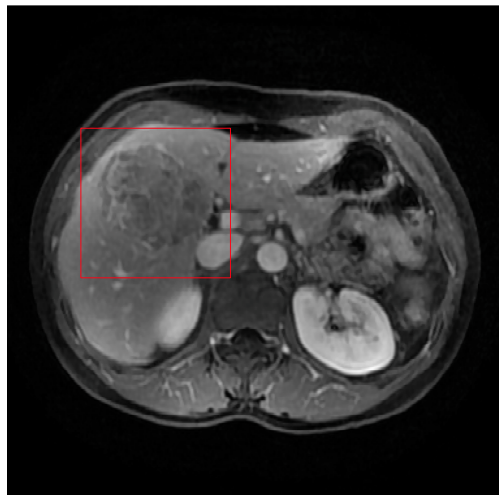

ii) Bile duct adenoma

A. T2WI

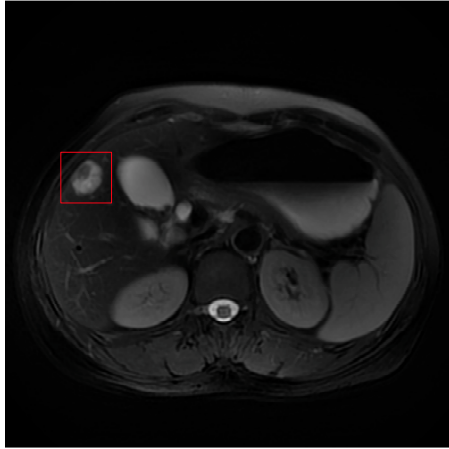

B. DWI

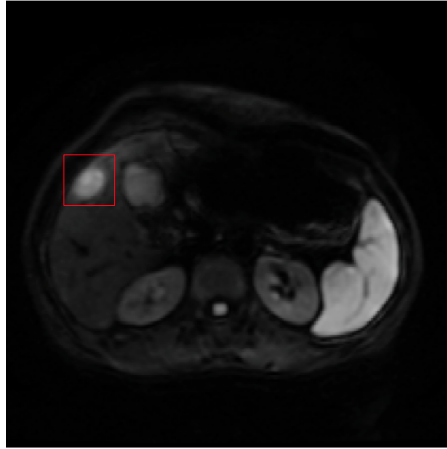

C. Precontrast—T1WI

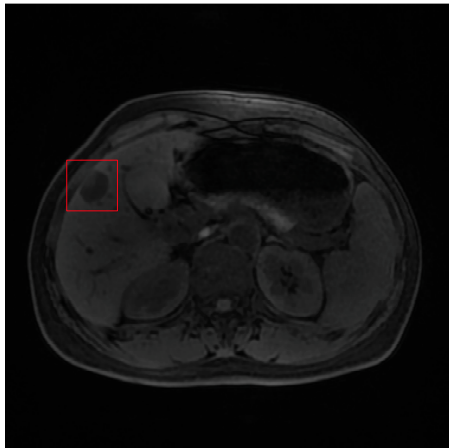

D. late arterial phase

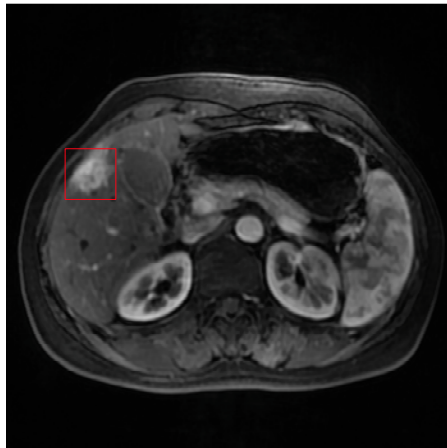

E. portal venous phase

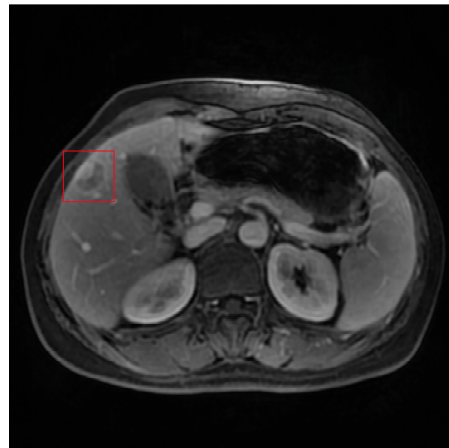

F. equilibrium phase

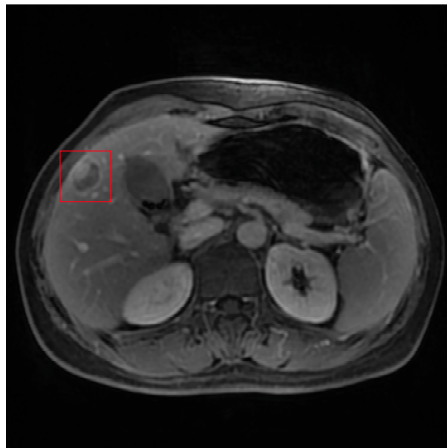

**Fig. S3. Example HCC false positive cases. i), Epithelioid angiomyolipoma. ii), Bile duct adenoma. (A) T2WI (B) DWI (C) Pre-contrast—T1WI (D) late arterial phase (E) portal venous phase (F) equilibrium phase.**
